# Supplementary material for: Nanoporous composites prepared by a combination of SBA-15 with Mg–Al mixed oxides. Water vapor sorption properties
Source: publisher site journal article supplement (doi:10.3762/bjnano.5.136), 2014-08-07
Supplement: Additional file 1 [file 2190-4286-5-136-S1.pdf]

# Supporting Information

for

## **Nanoporous composites prepared by combination of SBA-15 with Mg–Al mixed oxides. Water vapor sorption properties**

Amaury Pérez-Verdejo<sup>1</sup>, Alvaro Sampieri<sup>1\*</sup>, Heriberto Pfeiffer<sup>2</sup>, Mayra Ruiz-Reyes<sup>1</sup>,  
Juana-Deisy Santamaría<sup>1</sup> and Geolar Fetter<sup>3</sup>

Address: <sup>1</sup>Benemérita Universidad Autónoma de Puebla, Facultad de Ingeniería Química, Ciudad Universitaria, 72570, Puebla, PUE, Mexico, <sup>2</sup>Instituto de Investigaciones en Materiales, Universidad Nacional Autónoma de México, Circuito exterior s/n, Cd. Universitaria, Del. Coyoacán, 04510, México DF, Mexico and <sup>3</sup>Benemérita Universidad Autónoma de Puebla, Facultad de Ciencias Químicas, Ciudad Universitaria, 72570, Puebla, PUE, Mexico.

Email: Alvaro Sampieri - alvaro.sampieri@gmail.com

\*Corresponding author

## Additional characterization results

### XRD diffraction

Figure S1 shows the XRD patterns at small angle  $2\theta$  of composite. If the composites are prepared by post-synthesized method, HT/SBA samples, XRD patterns show the diffraction peaks characteristic of the SBA-15, (100), (110) and (200). The (Mg/Al)/SBA exhibit a very small peaks at  $1.5^\circ 2\theta$ . Interlayer distance ( $d_{100}$ ) are presented in Table 1.

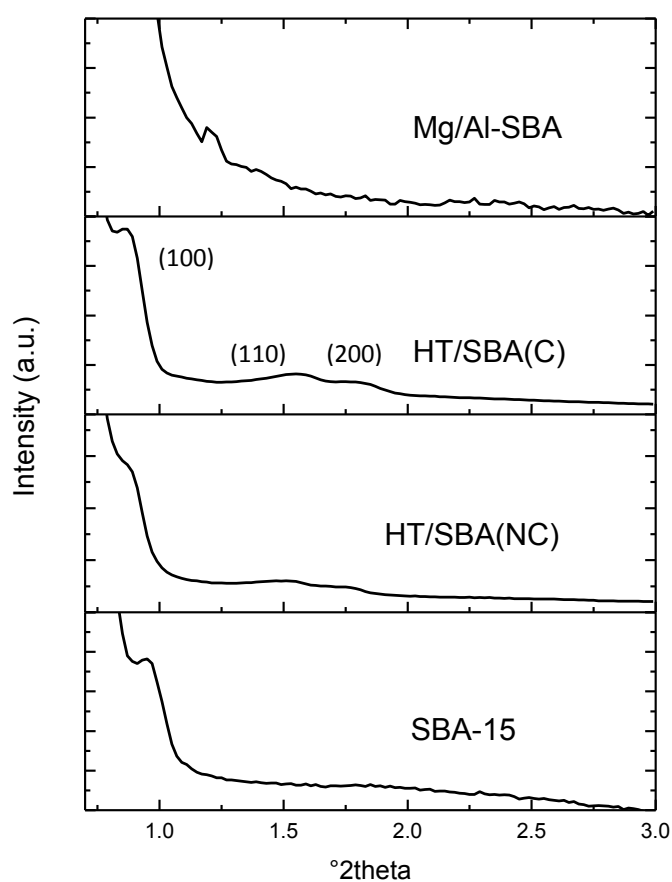

**Figure S1:** XRD patterns of samples at low  $2\theta$ .

## Thermogravimetric analysis

Figure 3 compares the thermograms (TG) of all composites previously calcined at 550 °C. The weight loss of SBA-15 is rather insignificant (0.8 wt %), which is attributed to the water molecules desorption. Slight weight variations observed from 200 °C are due to condensation of isolated silanol groups. The *post-synthesized* composites, HT/SBA(C) and HT/SBA(NC), present ca. 4 wt % of difference. The HT/SBA(NC) composite may present more silanol groups than HT/SBA(C) [1]. Still, the Mg–Al hydrotalcite presented the most weight loss of all samples, ca.12 wt %. The in situ-synthesized composite, (Mg/Al)SBA shows a final weight loss similar to the HT/SBA(NC), ca. 8 wt %. The weight loss of composite is due to the OH decomposition from superficial  $[\text{Mg-Al}(\text{OH})_n]^{(2-n)}$  groups, which remain on the composites surface [1].

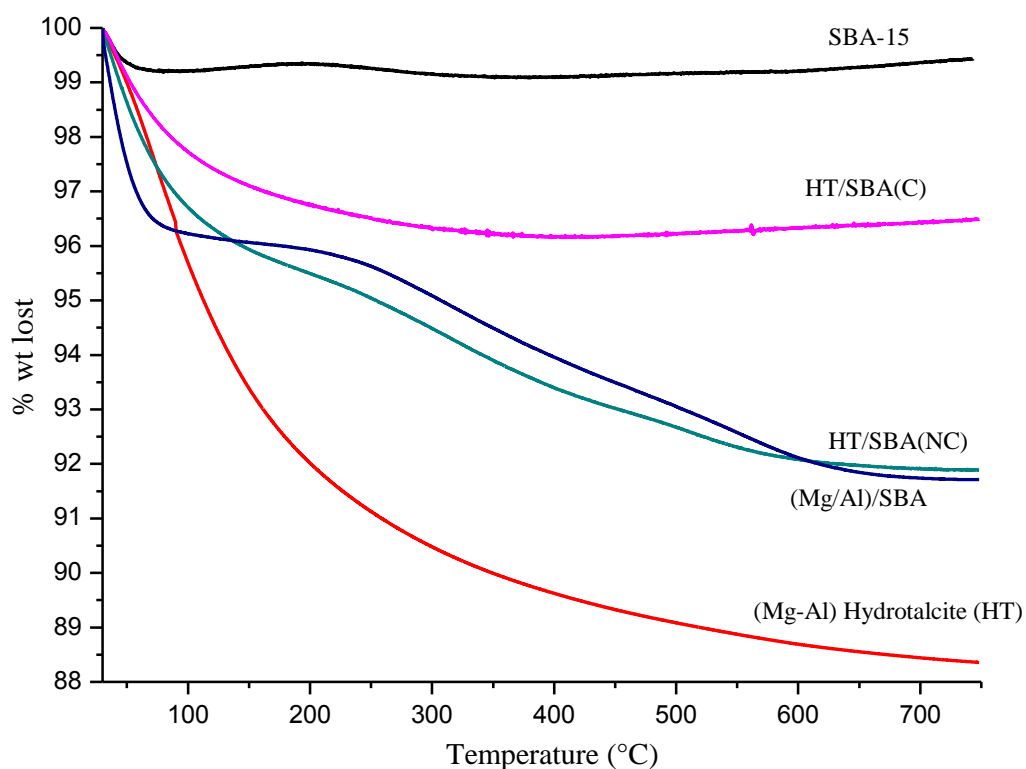

**Figure S2:** Thermogravimetric (TG) experiments of the HT, SBA-15 and nanoporous composites. All samples were previously calcined at 550 °C.

## SEM and TEM images of SBA-15

The SEM analysis shows a SBA-15 with elongated particles having sized between 0.5 and 2  $\mu\text{m}$ , Figure S3. By TEM analysis the channels characteristic of the SBA-15 are observed, Figure S4.

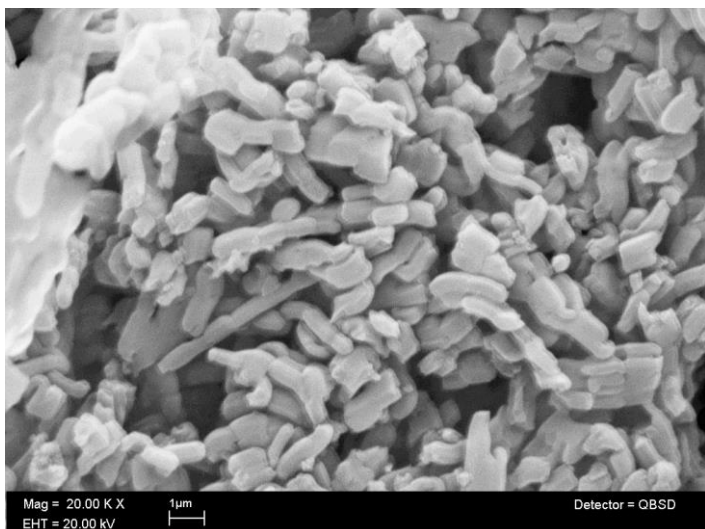

**Figure S3:** SEM image of SBA-15.

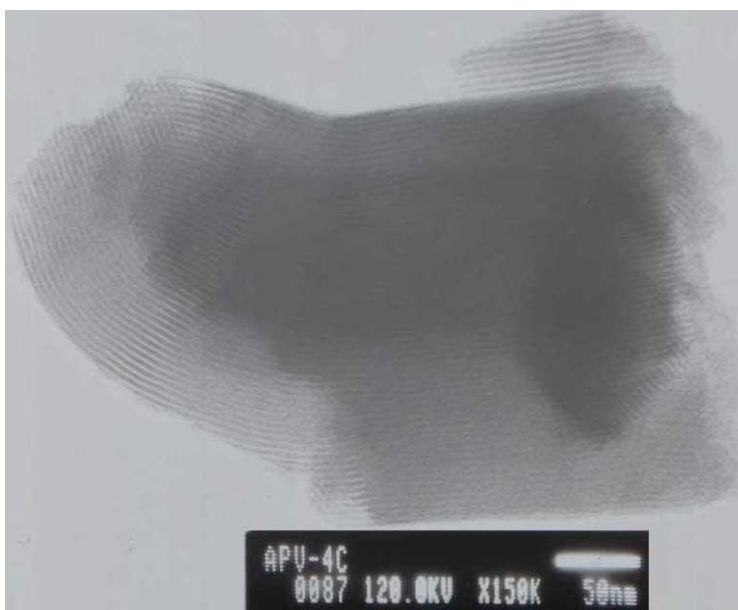

**Figure S4:** TEM image of SBA-15.

## References

1. Ide, M.; El-Roz, M.; De Canck, E.; Vicente, A.; Planckaert, T.; Bogaerts, T.; Van Driessche, I.; Lynen, F.; Van Speybroeck, V.; Thybault-Starzyk, F.; Van Der Voort, P. *Phys. Chem. Chem. Phys.* **2013**, *15*, 642. doi:[10.1039/c2cp42811c](https://doi.org/10.1039/c2cp42811c)
